# Supplementary material for: Biosynthesis of Gamma-Aminobutyric Acid by Engineered Clostridium tyrobutyricum Co-Overexpressing Glutamate Decarboxylase and Class I Heat Shock Protein
Source: MDPI journal article supplement (doi:10.3390/fermentation9050445), 2023-05-08
Supplement: s1 [file s1]

# Supplementary Materials:

**Table S1.** Primers used in this study.

| Primer       | Sequence (5'->3')                                                 |
|--------------|-------------------------------------------------------------------|
| ecgadPcat1-F | GAAACAGCTATGACCGCGGCCGCGTAGACTTTAAGGATGGAACCTTT<br>GA             |
| ecgadPcat1-R | CTTATCCATAAAAAACCACCCTTTCATAAATTATATAAA                           |
| ecgadB-F     | GGGTGGTTTTTATGGATAAGAAGCAAGTAACGGATT                              |
| ecgadB-R     | GACGTCGACTCTAGAGGATCCTCAGGTGTGTTTAAAGCTGTTCTGC                    |
| lcgadPcat1-F | GAAACAGCTATGACCGCGGCCGCGTAGACTTTAAGGATGGAACCTTT<br>GA             |
| lcgadPcat1-R | CGTATAACATAAAAAACCACCCTTTCATAAATTATATAAA                          |
| lcgad-F      | GGTGGTTTTTATGTTATACGGAAAAGAAAATCGCG                               |
| lcgad-R      | GACGTCGACTCTAGAGGATCCTTAGTGAGTAAAGCCATAAGTTTTATT<br>TTC           |
| lpgadPcat1-F | GAAACAGCTATGACCGCGGCCGCGTAGACTTTAAGGATGGAACCTTT<br>GA             |
| lpgadPcat1-R | CGTATAACATAAAAAACCACCCTTTCATAAATTATATAAA                          |
| lpgad-F      | GGTGGTTTTTATGTTATACGGTAAACACAATCATGAAG                            |
| lpgad-R      | GACGTCGACTCTAGAGGATCCTCAGTGTGTGAATCCGTATTTCTTAG                   |
| BS2Pcat1-F   | GAAACAGCTATGACCGCGGCCGCGTAGACTTTAAGGATGGAACCTTT<br>GA             |
| BS2Pcat1-R   | ACTTGCCATAAAAAACCACCCTTTCATAAATTATATAAA                           |
| 1BS2-F       | GGGTGGTTTTTATGGCAAGTTTTCAAAGTTTTGG                                |
| 1BS2-R       | CCATGGACGCGTGACGTCGACTTATTCAAGAAGCTTTTCATATTCTTTT                 |
| BS2Pfla-F    | GAAACAGCTATGACCGCGGCCGCTATTTAATAATTATTATTGAATAATT<br>TTATTTTTGT   |
| BS2Pfla-R    | TTGAAAACCTTGCCATTTTAACTCCTCCTCAACACTAAATAATTAT                    |
| 2BS2-F       | TGAGGAGGAGTTAAAATGGCAAGTTTTCAAAGTTTTGG                            |
| 2BS2-R       | CCATGGACGCGTGACGTCGACTTATTCAAGAAGCTTTTCATATTCTTTT                 |
| BS2Pcathl-F  | GAAACAGCTATGACCGCGGCCGCTTTTAAACAAAATATATTGATAAAA<br>ATAATAATAGTGG |
| BS2Pcathl-R  | TTGAAAACCTTGCCATTCTAACTAACCTCCTAAATTTTGATACG                      |
| 3BS2-F       | AGGAGGTAGTTAGAATGGCAAGTTTTCAAAGTTTTGG                             |
| 3BS2-R       | CCATGGACGCGTGACGTCGACTTATTCAAGAAGCTTTTCATATTCTTTT                 |
| grpE-QF      | GATGTAGAAGAAATTCCTGCA                                             |
| grpE-QR      | ATTTGCCACTTTAACCATACTGT                                           |
| dnaK-QF      | AGGGGGTTAATCCAGATGAGTGTG                                          |
| dnaK-QR      | CAAGAGTAAGTGGTGTAAACATCAAG                                        |
| dnaJ-QF      | GAAGCCTATCAGGTTTTATCGG                                            |
| dnaJ-QR      | GCTCCACCAGCACCCTAAATCAG                                           |
| groES-QF     | GCTGCTAAAGAAAAACCACAGGAAG                                         |
| groES-QR     | CTCTACACCATCAATCTTTAC                                             |
| groEL-QF     | GGCAAAGAGCATTTTATTCGGTG                                           |
| groEL-QR     | CTTCCCTTTGGTCCAAGTGTA                                             |
| htpG-QF      | AAGCATTTCAAGGAGGATAAGG                                            |
| htpG-QR      | CATCATTTGGCAAATTGCACTGG                                           |
| GTP-binding  | CAATAATTGCCCATGTAGATCACGG                                         |
| gene-QF      |                                                                   |
| GTP-binding  | GAGTCCATAACCCTCTCTTGAAC                                           |

|                 |                                                 |
|-----------------|-------------------------------------------------|
| gene-QR         |                                                 |
| PRO-F           | TGAAGTACATCACCGACGAGCAAG                        |
| PRO-R           | TGCTGCAAGGCGATTAAAGTTGGGT                       |
| Pcat1(groESL)-F | TAAGGATCCTCTAGAGTCGACGTAGACTTTAAGGATGGAACCTTTGA |
| Pcat1(groESL)-R | TTCATAAAAACCAACCCTTTCATAAATTATATAAA             |
| groESL-F        | GAAAGGGTGGTTTTTATGAATATTAGACCACTTGGAGACAGA      |
| groESL-R        | CAGGCCTCGAGATCTCCATGGTTAATACATTCCTTCCATTCCGC    |

**Table S2.** Strains and plasmids used in this study.

| Strain/plasmid          | Relevant characteristics                                   | Reference/source |
|-------------------------|------------------------------------------------------------|------------------|
| <b>Strains</b>          |                                                            |                  |
| <i>C. tyrobutyricum</i> | ATCC 25755                                                 | ATCC             |
| Ct-pMA01                | ATCC 25755 with pMA01                                      | This study       |
| Ct-pMA02                | ATCC 25755 with pMA02                                      | This study       |
| Ct-pMB01                | ATCC 25755 with pMB01                                      | This study       |
| Ct-pMAG                 | ATCC 25755 with pMAG                                       | This study       |
| <i>E. coli</i> CA434    | <i>E. coli</i> HB101 with plasmid R702                     | [1]              |
| <b>Plasmids</b>         |                                                            |                  |
| pMTL82151               | ColE1 ori; Cm <sup>R</sup> ; pBP1 ori; Tarj                | [2]              |
| pMA01                   | From pMTL82151; Pcat1- <i>ecgadB</i>                       | This study       |
| pMA02                   | From pMTL82151; Pcat1- <i>lcgadB</i>                       | This study       |
| pMB01                   | From pMTL82151; Pcat1- <i>lpgadB</i>                       | This study       |
| pMAG                    | From pMTL82151; Pcat1- <i>lcgadB</i> -Pcat1- <i>groESL</i> | This study       |

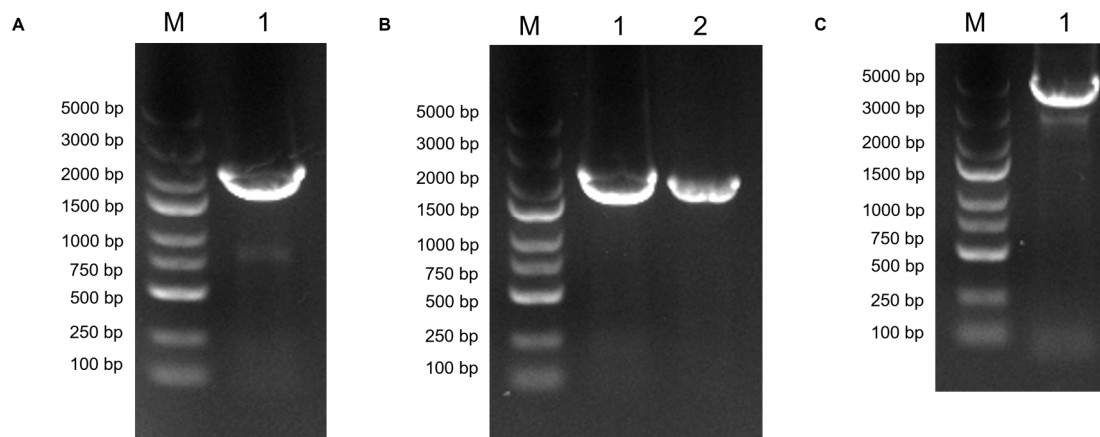

**Figure S1.** Electrophoresis results of colony PCR for recombinant strains. (A) M: DNA Marker; 1: Ct-pMA01; (B) M: DNA Marker; 1: Ct-pMA02; 2: Ct-pMB01; (C) M: DNA Marker; 1: Ct-pMAG

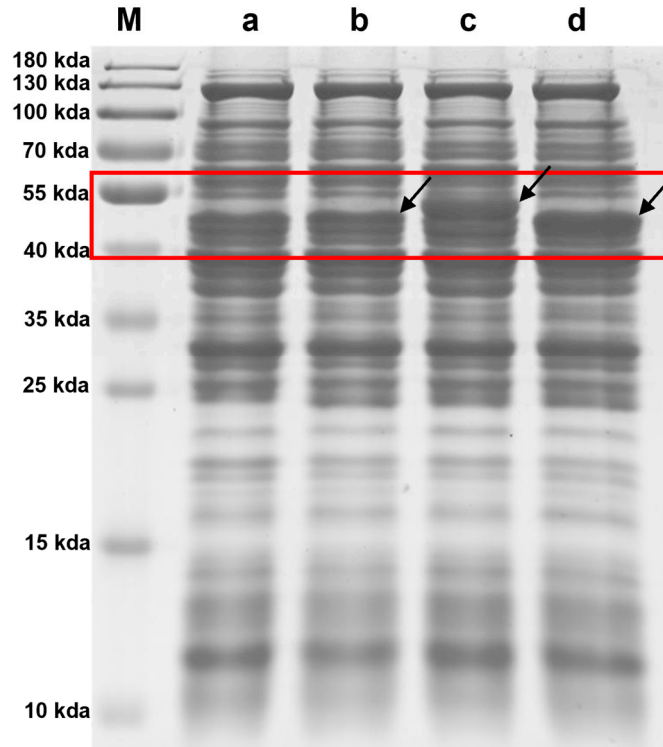

**Figure S2.** SDS-PAGE of cell extracts prepared by *C. tyrobutyricum* wild type and engineered strains. **M** contained molecular mass marker proteins. **a**, **b**, **c** and **d** were wild type, Ct-pMA01 (EcgaB 52.7 kDa), Ct-pMA02 (LcgaB, 54.0 kDa) and Ct-pMB01 (LpgaB, 53.4 kDa), respectively. Arrows and box indicated the location of the bands.

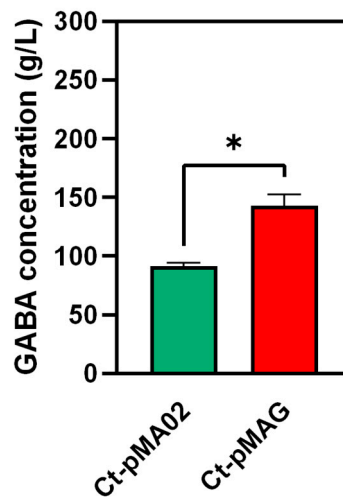

**Figure S3.** Profiles of L-Glu bioconversion by Ct-pMA02 and Ct-pMAG. Cells were harvested by centrifugation at 12,000 rpm for 1 min. The cell pellets were washed by PBS and then resuspended to

OD<sub>600</sub>=5 in ddH<sub>2</sub>O in the flash tank with a working volume of 50 mL. Bioconversion was carried out at 37 °C, 150 rpm with 3 mol/L L-Glu. GABA production was determined by collecting samples at 12 h. (\* $p < 0.05$ , Student's  $t$ -test).

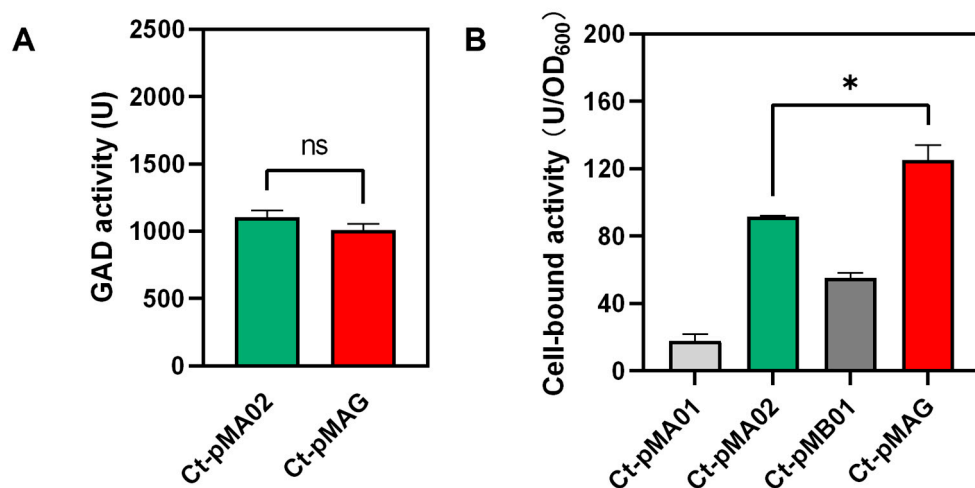

**Figure S4.** (A) Comparison of GAD activity between Ct-pMA02 and Ct-pMAG. (B) Profiles of Cell-bound activity of different engineered *C. tyrobutyricum*. GAD activity and Cell-bound activity were determined by collecting samples at stationary phase. Statistically significant differences (ns indicated no significance, \* $p < 0.05$ , Student's  $t$ -test) were indicated by asterisks.

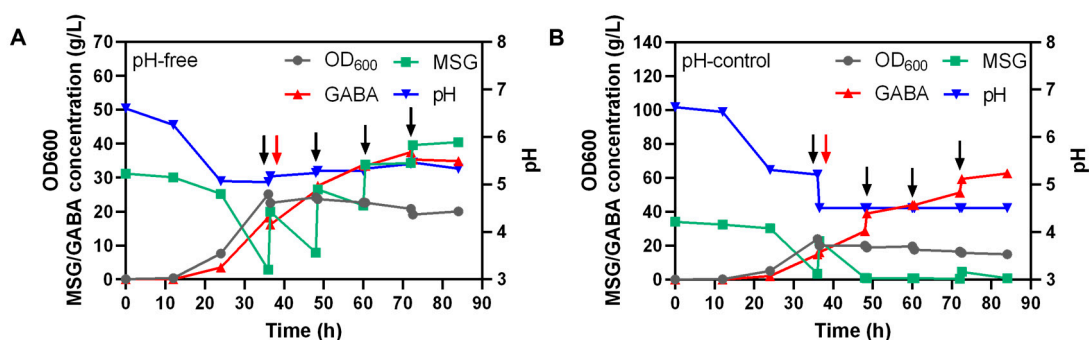

**Figure S5.** Fed-batch fermentation of Ct-pMAG in a 5 L bioreactor at 37 °C for 84 h. MSG and glucose were supplied during the period. (A) Fermentation using pH-free strategy, with 4 times 50 mL MSG aliquot (600 g/L) added. (B) Fermentation using pH-control strategy, with 4 times 50 mL MSG aliquot (600 g/L) added. Black arrow indicated MSG feeding moment and red arrow indicated 60 g/L glucose feeding moment.

1. Williams, D.R.; Young, D.I.; Young, M. Conjugative plasmid transfer from *Escherichia coli* to *Clostridium acetobutylicum*. *Journal of general microbiology* **1990**, *136*, 819-826, doi:10.1099/00221287-136-5-819.
2. Heap, J.T.; Pennington, O.J.; Cartman, S.T.; Minton, N.P. A modular system for *Clostridium* shuttle plasmids. *Journal of Microbiological Methods* **2009**, *78*, 79-85, doi:<https://doi.org/10.1016/j.mimet.2009.05.004>.
